# Supplementary material
Source: PubMed Central journal article supplement (PMC4724950)

## Supplementary online information

| Participant ID | Transcript affected | Mutation          | Melanoma-free for > 2 years prior to study | Variant Effect Predictor (VEP - Ensembl) |
|----------------|---------------------|-------------------|--------------------------------------------|------------------------------------------|
| OX_001         | P16-INK4a only      | c.88delG          | Yes                                        | Frameshift variant                       |
| OX_002         | P16-INK4a only      | c.88delG          | Yes                                        | Frameshift variant                       |
| OX_003         | P16-INK4a only      | c.88delG          | Yes                                        | Frameshift variant                       |
| OX_004         | Both                | c.458-105A>G      | Yes                                        | Intronic variant                         |
| OX_005         | Both                | c.458-105A>G      | Yes                                        | Intronic variant                         |
| OX_006         | Both                | c.458-105A>G      | Yes                                        | Intronic variant                         |
| OX_007         | P16-INK4a only      | c.52_57dup        | Yes                                        | Protein altering variant                 |
| OX_008         | P16-INK4a only      | c.52_57dup        | Yes                                        | Protein altering variant                 |
| OX_009         | Both                | c.159G>A          | Yes                                        | Missense variant                         |
| OX_010         | Both                | c.159G>A          | Yes                                        | Missense variant                         |
| OX_011         | Both                | c.458-105A>G      | Yes                                        | Intronic variant                         |
| OX_012         | Both                | <i>Not tested</i> | Yes                                        | NA                                       |
| LEI_001        | Both                | c.225_243del19    | No                                         | Frameshift variant                       |
| LEI_002        | Both                | c.225_243del19    | Yes                                        | Frameshift variant                       |
| LEI_003        | Both                | c.225_243del19    | Yes                                        | Frameshift variant                       |
| LEI_004        | Both                | c.225_243del19    | Yes                                        | Frameshift variant                       |
| LEI_005        | Both                | c.225_243del19    | Yes                                        | Frameshift variant                       |
| LEI_006        | Both                | c.225_243del19    | Yes                                        | Frameshift variant                       |
| LEI_007        | Both                | c.225_243del19    | Yes                                        | Frameshift variant                       |
| LEI_008        | Both                | c.225_243del19    | Yes                                        | Frameshift variant                       |
| LEI_009        | Both                | c.225_243del19    | Yes                                        | Frameshift variant                       |

|         |      |                |     |                    |
|---------|------|----------------|-----|--------------------|
| LEI_010 | Both | c.225_243del19 | Yes | Frameshift variant |
| LEI_011 | Both | c.67G>C        | No  | Missense variant   |
| LEI_012 | Both | c.225_243del19 | No  | Frameshift variant |
| LEI_013 | Both | c.225_243del19 | Yes | Frameshift variant |
| LEI_014 | Both | c.225_243del19 | Yes | Frameshift variant |
| LEI_015 | Both | c.225_243del19 | Yes | Frameshift variant |
| LEI_016 | Both | c.225_243del19 | Yes | Frameshift variant |
| LEI_017 | Both | c.225_243del19 | Yes | Frameshift variant |
| LEI_018 | Both | c.225_243del19 | Yes | Frameshift variant |
| LEI_019 | Both | c.225_243del19 | Yes | Frameshift variant |

**Supplementary table 1** List of mutations identified in carriers (annotated against CDKN2A-001 [ENST00000304494]) by targeted sequencing. The second column indicates whether the mutation maps to a region encoding just p16<sup>INK4a</sup> or both p16<sup>INK4a</sup> and p14<sup>ARF</sup>. Participant ID is an anonymous number assigned to each case, and the prefix indicates from which cohort the patient was recruited (OX = Oxford, UK; LEI = Leiden, Netherlands).

| Measure/index                            | Parameter           | Formula or mathematical model used                                                                                                                                                                                                                                                               | Reference |
|------------------------------------------|---------------------|--------------------------------------------------------------------------------------------------------------------------------------------------------------------------------------------------------------------------------------------------------------------------------------------------|-----------|
| iHOMA-B                                  | Beta-cell function  | Computer model available via ( <a href="http://www.dtu.ox.ac.uk/homacalculator/">http://www.dtu.ox.ac.uk/homacalculator/</a> ).                                                                                                                                                                  | (1)       |
| iHOMA-S                                  | Insulin sensitivity | Computer model available via ( <a href="http://www.dtu.ox.ac.uk/homacalculator/">http://www.dtu.ox.ac.uk/homacalculator/</a> ).                                                                                                                                                                  | (1)       |
| BIGTT-AIR <sub>0-30-120</sub>            | Beta-cell function  | $\exp[8.20 + (0.00178 * \text{insulin}_0) + (0.00168 * \text{insulin}_{30}) - (0.000383 * \text{insulin}_{120}) - (0.314 * \text{glucose}_0) - (0.109 * \text{glucose}_{30}) + (0.0781 * \text{glucose}_{120}) + (0.180 * \text{gender (where male=0 and female=1)}) - (0.032 * \text{BMI})]$    | (2)       |
| BIGTT-S <sub>I</sub> <sub>0-30-120</sub> | Insulin sensitivity | $\exp[4.90 - (0.00402 * \text{insulin}_0) - (0.000556 * \text{insulin}_{30}) - (0.00127 * \text{insulin}_{120}) - (0.152 * \text{glucose}_0) - (0.00871 * \text{glucose}_{30}) - (0.0373 * \text{glucose}_{120}) - (0.145 * \text{gender (where male=0 and female=1)}) - (0.0376 * \text{BMI})]$ | (2)       |
| Belfiore ISI                             | Insulin sensitivity | $2 / [(0.5 * \text{glucose}_0 + \text{glucose}_{60} + 0.5 * \text{glucose}_{120}) / 11.36] * (0.5 * \text{insulin}_0 + \text{insulin}_{60} + 0.5 * \text{insulin}_{120}) / 638 + 1]$                                                                                                             | (3)       |
| Matsuda ISI                              | Insulin Sensitivity | $10\,000 * \sqrt{(\text{glucose}_0 * \text{insulin}_0 * \text{glucose}_{\text{mean-OGTT}} * \text{insulin}_{\text{mean-OGTT}})}$                                                                                                                                                                 | (4)       |
| AUC                                      | Multiple            | Area under curve estimated using trapezoidal rule                                                                                                                                                                                                                                                | (5)       |
| Insulinogenic index                      | Beta-cell function  | $(\text{insulin}_{30} - \text{insulin}_0) / (\text{glucose}_{30} - \text{glucose}_0)$                                                                                                                                                                                                            | (6)       |
| Disposition index                        | Beta-cell function  | $\text{AUC}_{\text{insulin-OGTT}} / \text{AUC}_{\text{glucose-OGTT}} * \text{Matsuda ISI}$                                                                                                                                                                                                       | (6)       |
| Hepatic insulin clearance                | Insulin clearance   | $\text{AUC}_{\text{C-Peptide}} / \text{AUC}_{\text{Insulin}}$                                                                                                                                                                                                                                    | (7)       |
| Fasting insulin clearance                | Insulin clearance   | $\text{C-peptide}_0 / \text{insulin}_0$                                                                                                                                                                                                                                                          | (7)       |

**Supplementary table 2** Definitions of physiological measurements and indices derived from the OGTT. Subscripts denote time points during the OGTT. Units are pmol/L for insulin, nmol/L for C-peptide and mmol/L for glucose, except in the case of Matsuda ISI and the disposition index, where glucose was inputted in units of mg/dL and insulin as  $\mu\text{U/mL}$ .

|                                            | <b>Mutation carriers</b> | <b>Non-carriers</b> | <b>P-value</b> |
|--------------------------------------------|--------------------------|---------------------|----------------|
| n                                          | 28                       | 31                  | NA             |
| BMI [cm/kg <sup>2</sup> ]                  | 27 [19, 38]              | 27 [19, 37]         | 0.66           |
| Age [yrs]                                  | 51 [21, 71]              | 52 [25, 84]         | 0.96           |
| Gender [% male]                            | 43                       | 33                  | 0.58           |
| Fasting glucose [mmol/L]                   | 5.1 [4.3, 6.3]           | 5.1 [3.2, 6.4]      | 0.92           |
| Fasting insulin [pmol/L]                   | 91 [15, 337]             | 57 [22, 150]        | 0.01           |
| iHOMA-B                                    | 133 [38, 452]            | 99 [45, 237]        | 0.03           |
| iHOMA-S                                    | 86 [18, 329]             | 116 [35, 236]       | 0.04           |
| BIGTT-AIR [*10 <sup>3</sup> ]              | 6.6 [0.9, 28]            | 3.2 [1.2, 12]       | 0.03           |
| BIGTT-S                                    | 5.8 [0.4, 12.7]          | 7.5 [1.1, 17.8]     | 0.08           |
| Belfiore ISI                               | 0.80 [0.17, 1.35]        | 0.96 [0.35, 1.77]   | 0.03           |
| Matsuda ISI                                | 4.3 [0.8; 11.1]          | 6.1 [1.5; 20.9]     | 0.02           |
| AUC <sub>glucose</sub>                     | 831 [563, 1449]          | 832 [502, 1086]     | 0.98           |
| AUC <sub>Insulin</sub> [*10 <sup>4</sup> ] | 7.2 [2.4, 25]            | 4.9 [1.1, 15]       | 0.02           |
| Insulinogenic index                        | 205 [39, 561]            | 155 [53, 360]       | 0.10           |
| Disposition index                          | 2.3 [1.1, 3.8]           | 2.3 [1.0, 3.7]      | 0.92           |

**Supplementary table 3** Comparison of OGTT-derived measures for carriers and non-carriers after exclusion of three subjects that had presented with cancer within two years prior to the study (supplementary table 1). Data are given as mean and range [min; max], and p-values are from Welch's t-test, except for gender distribution where the Chi-squared test was performed. Details on definitions of physiological measures are listed in supplementary table 2. \* P-value < 0.05.

|                                                                                   | <b>Mutation carriers</b> | <b>Non-carriers</b>  | <b>P value</b> |
|-----------------------------------------------------------------------------------|--------------------------|----------------------|----------------|
| n                                                                                 | 8                        | 8                    | NA             |
| AUC <sub>insulin</sub> 0-10 min (pmol.L <sup>-1</sup> .min*10 <sup>-3</sup> )     | 4.8 [1.73, 13.2]         | 2.9 [1.84, 4.28]     | 0.51           |
| AUC <sub>insulin</sub> 10-180 min (pmol.L <sup>-1</sup> .min*10 <sup>-3</sup> )   | 35.5 [13.7, 94.9]        | 16.9 [12.5, 22.2]    | 0.16           |
| AUC <sub>C-peptide</sub> 0-10 min (pmol.L <sup>-1</sup> .min*10 <sup>-3</sup> )   | 15.1 [9.1, 31.9]         | 11.7 [5.5, 14.5]     | 0.96           |
| AUC <sub>C-peptide</sub> 10-180 min (pmol.L <sup>-1</sup> .min*10 <sup>-3</sup> ) | 198 [103, 364]           | 152 [101, 186]       | 1.00           |
| Net IVGTT insulin secretion 0-10 min (pmol.L <sup>-1</sup> )                      | 0.56 [0.29, 0.84]        | 0.50 [0.10, 1.04]    | 0.65           |
| Net IVGTT insulin secretion 10-180 min (pmol.L <sup>-1</sup> )                    | 4.2 [1.20, 11.8]         | 2.8 [1.10, 4.98]     | 0.65           |
| Insulin sensitivity, S <sub>I</sub> (min <sup>-1</sup> .pmol <sup>-1</sup> .L)    | 0.72 [0.19, 1.28]        | 0.68 [0.30, 0.95]    | 0.72           |
| Disposition index [*10 <sup>-3</sup> ]                                            | 2.4 [1.14, 4.44]         | 1.9 [0.77, 3.40]     | 0.51           |
| C-peptide disposition index                                                       | 8.9 [3.45, 12.6]         | 7.8 [4.00, 13.7]     | 0.80           |
| Fractional hepatic insulin throughput                                             | 0.53 [0.34, 1.12]        | 0.41 [0.26, 0.74]    | 0.23           |
| Plasma insulin elimination rate (min <sup>-1</sup> )                              | 0.098 [0.025, 0.207]     | 0.095 [0.042, 0.235] | 0.72           |

**Supplementary table 4** IVGTT-derived measures of  $\beta$ -cell function, insulin sensitivity and hepatic clearance. Data are given as mean and range [min; max]. All p-values are based on Mann-Whitney U test.

## Supplementary figure legends

**Supplementary figure 1** Serum glucose (*left panel*) and insulin (*right panel*) levels during a 120-min OGTT in twenty-six cases with *CDKN2A* loss-of-function mutations affecting both p16<sup>INK4a</sup> and p14<sup>ARF</sup> (*black triangles, dotted line*), five cases with *CDKN2A* loss-of-function mutations affecting p16<sup>INK4a</sup> exclusively (*black squares, solid line*), and thirty-one BMI-, age-, and gender-matched controls (*white circles, dashed line*). Data shown as mean +/- SEM.

**Supplementary figure 2** Serum glucose (*left panel*) and insulin (*right panel*) levels during a 180-min IVGTT in eight carriers (*pink circles*) and eight BMI- ( $p = 0.72$ ), age- ( $p = 0.96$ ), and gender-matched ( $p = 0.50$ ) controls (*blue squares*). Data shown as mean +/- SEM.

**Supplementary figure 3** Immunofluorescence staining of p16INK4a (Abcam, ab81278; recognizing isoform 1 of the protein) in the human beta-cell line, EndoC-bH1. In siRNA-mediated knockdown experiments, expression of p16INK4a protein was visibly down-regulated (*bottom panel*) as compared with control cells (*top panel*). Cell nuclei were stained using NucRed Dead 647 (Life Technologies). Images were taken on a BioRad Radiance 2100 confocal microscope with a 60X 1.0 N.A. objective, and the same laser settings and intensities were used across samples. Scale bar, 20  $\mu\text{m}$ .

**Supplementary figure 4** Gene expression profiles of critical cell-cycle regulators after silencing of *CDKN2A* in the human  $\beta$ -cell line, EndoC-bH1. Knockdown experiments were performed as described for figure 2. Relative gene expression of *CDK4* (*top left*), *CDK6* (*top right*), *CDKN2A* (*bottom left*) and *CDKN2B* (*bottom right*) corrected for expression of two housekeepers using the delta-delta Ct method, and normalized to non-targeting control. As shown, we observed efficient knockdown of *CDKN2A* with no off-target effect on the *CDKN2B* gene. Bars represent means for  $n = 4-5$  and error bars are SEM.

**Supplementary figure 5** Insulin content normalized to cell-count following *CDKN2A* knockdown. After static insulin secretion assays, cells were counted and insulin contents extracted as described in figure 2. Using these data, the insulin content relative to the number of cells per well was calculated as the ratio between these two numbers, and normalized to scrambled control. Bars represent means for the aggregate of basal and high glucose measurements for  $n = 16$ , and error bars are SEM.

**Supplementary figure 6** PKA activity in the EndoC-bH1 cell line following *CDKN2A* knockdown. 96 h after treatment with non-targeting (“scrambled”; *blue bar*) or *CDKN2A* (*red bar*) siRNAs, cells were harvested and PKA activity measured on sample input normalized to cell numbers. Substrate conversion rates were calculated as the ratio of non-phosphorylated to total peptide using fluorescence intensities quantified with standard software on the ChemiDoc MP system. Data shown as mean +/- SEM for three independent replicates.

**Supplementary figure 7** Outline of two non-mutually exclusive mechanisms compatible with the phenotype of *CDKN2A* mutations-carriers. According to model 1 (*left*), a primary reduction in insulin sensitivity leads to a compensatory increase in insulin secretion to maintain glucose homeostasis. The effect of *CDKN2A*-loss would therefore be in non-beta cell tissues, such as liver. Model 2 (*right*), in contrast, represent the alternative scenario: chronically elevated insulin levels due to  $\beta$ -cell hypersecretion drives a progressive decrease in insulin receptors and insulin signalling through homologous desensitization (8). In this case, the primary effect of *CDKN2A* loss is on the pancreatic beta-cell, but the mechanism ultimately manifests as impaired insulin sensitivity and reduced insulin clearance. As discussed in the main text, it is likely that a combination of the two models contributes to both beta-cell hypersecretion and primary insulin resistance.

**Supplementary figure 8** Screenshot from the Human Islet Regulome Browser (9) showing annotations of chromatin state, transcription factor binding and variant association with type 2 diabetes at the *CDKN2A/B* locus. The genomic binding sites of islet transcription factors (PDX1, NKX2.2, FOXA2, NKX6.1, MAFB) are indicated by lines connected to the respective proteins. A Manhattan plot above shows log(p-values) of association with type 2 diabetes for variants in the MAGIC (*blue*) and DIAGRAM (*red*) datasets (10, 11). Lead variants tagging the two genome-wide association signals located downstream of *CDKN2B-AS1* are shown. Fine-mapping efforts have since publication of the islet regulome narrowed down the number of potential causative variants to credible sets of five and six variants (Gaulton et al, (2015) Nature Genetics, *in press*). Both of these sets contain variants that directly overlap a FOXA2 binding site.

## Supplementary references

- 1 Matthews, D.R., *et al.* (1985) Homeostasis model assessment: insulin resistance and beta-cell function from fasting plasma glucose and insulin concentrations in man. *Diabetologia* 28, 412-419
- 2 Hansen, T., *et al.* (2007) The BIGTT test: a novel test for simultaneous measurement of pancreatic beta-cell function, insulin sensitivity, and glucose tolerance. *Diabetes Care* 30, 257-262
- 3 Belfiore, F., *et al.* (1998) Insulin sensitivity indices calculated from basal and OGTT-induced insulin, glucose, and FFA levels. *Mol Genet Metab* 63, 134-141
- 4 Matsuda, M. and DeFronzo, R.A. (1999) Insulin sensitivity indices obtained from oral glucose tolerance testing: comparison with the euglycemic insulin clamp. *Diabetes Care* 22, 1462-1470
- 5 Pacini, G. and Mari, A. (2003) Methods for clinical assessment of insulin sensitivity and beta-cell function. *Best Pract Res Clin Endocrinol Metab* 17, 305-322
- 6 Phillips, D.I., *et al.* (1994) Understanding oral glucose tolerance: comparison of glucose or insulin measurements during the oral glucose tolerance test with specific measurements of insulin resistance and insulin secretion. *Diabet Med* 11, 286-292
- 7 Herzberg-Schafer, S.A., *et al.* (2010) Evaluation of fasting state-/oral glucose tolerance test-derived measures of insulin release for the detection of genetically impaired beta-cell function. *PLoS One* 5, e14194
- 8 Shanik, M.H., *et al.* (2008) Insulin resistance and hyperinsulinemia: is hyperinsulinemia the cart or the horse? *Diabetes Care* 31 Suppl 2, S262-268
- 9 Pasquali, L., *et al.* (2014) Pancreatic islet enhancer clusters enriched in type 2 diabetes risk-associated variants. *Nat Genet* 46, 136-143
- 10 Morris, A.P., *et al.* (2012) Large-scale association analysis provides insights into the genetic architecture and pathophysiology of type 2 diabetes. *Nat Genet* 44, 981-990
- 11 Voight, B.F., *et al.* (2010) Twelve type 2 diabetes susceptibility loci identified through large-scale association analysis. *Nat Genet* 42, 579-589



Supplementary figure 1

## Glucose levels

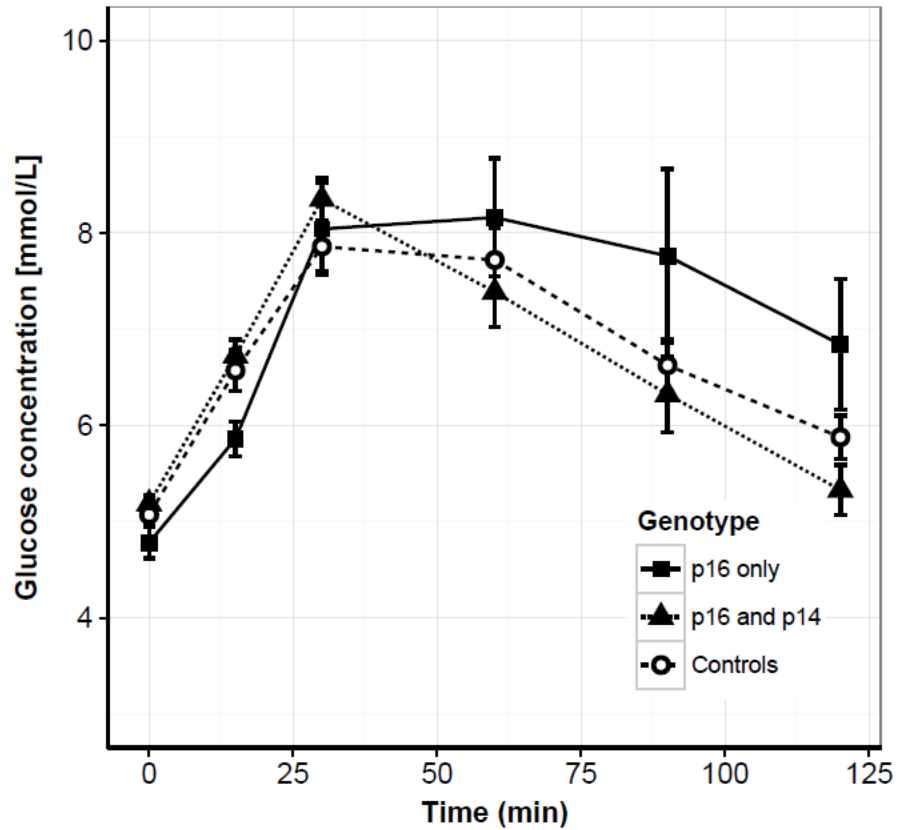

## Insulin levels

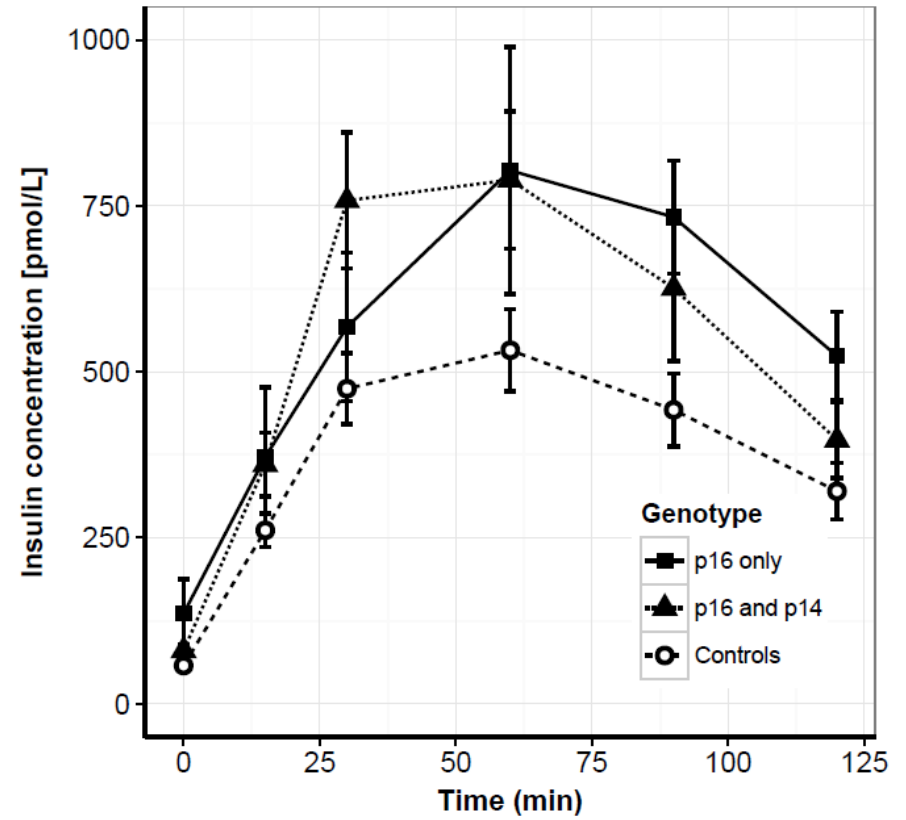

Supplementary figure 2

Glucose levels

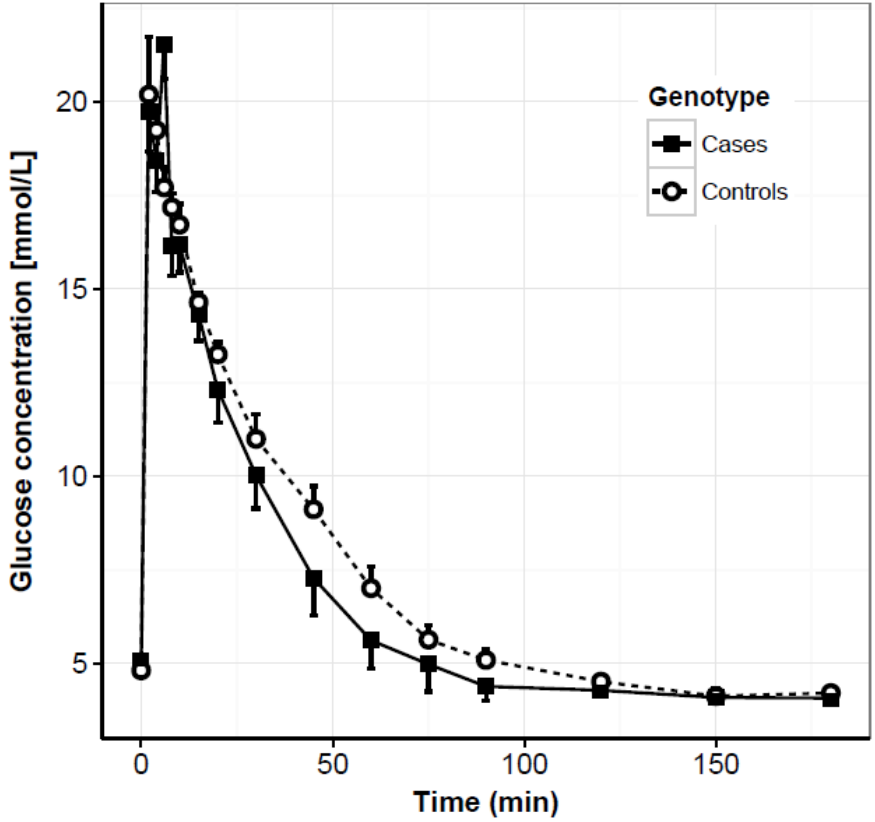

Insulin levels

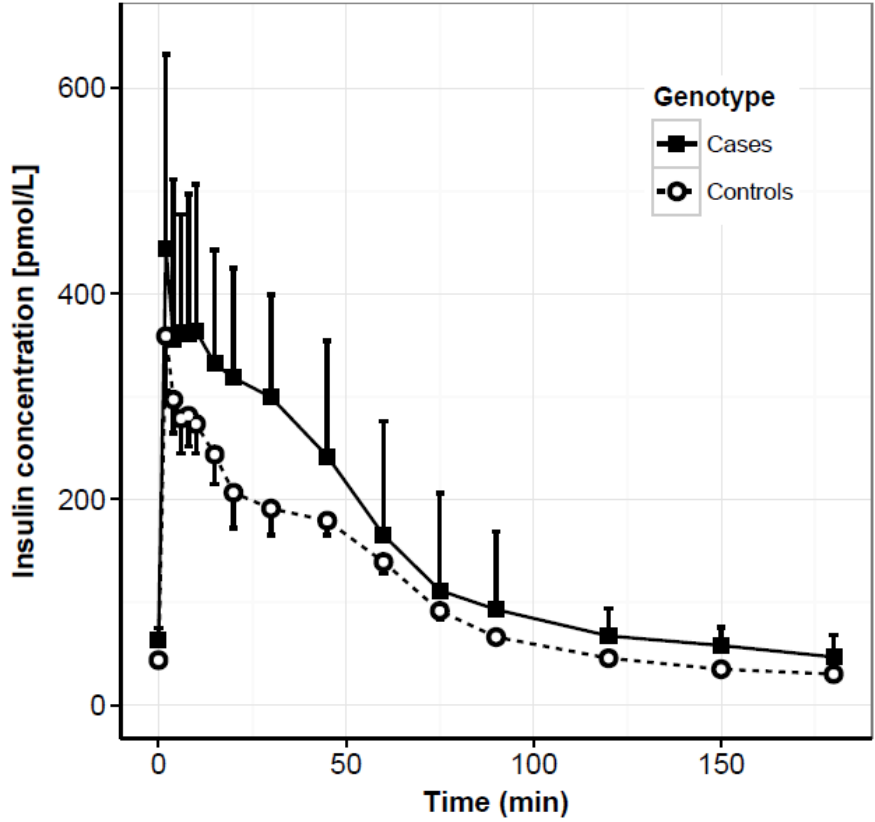

Supplementary figure 3

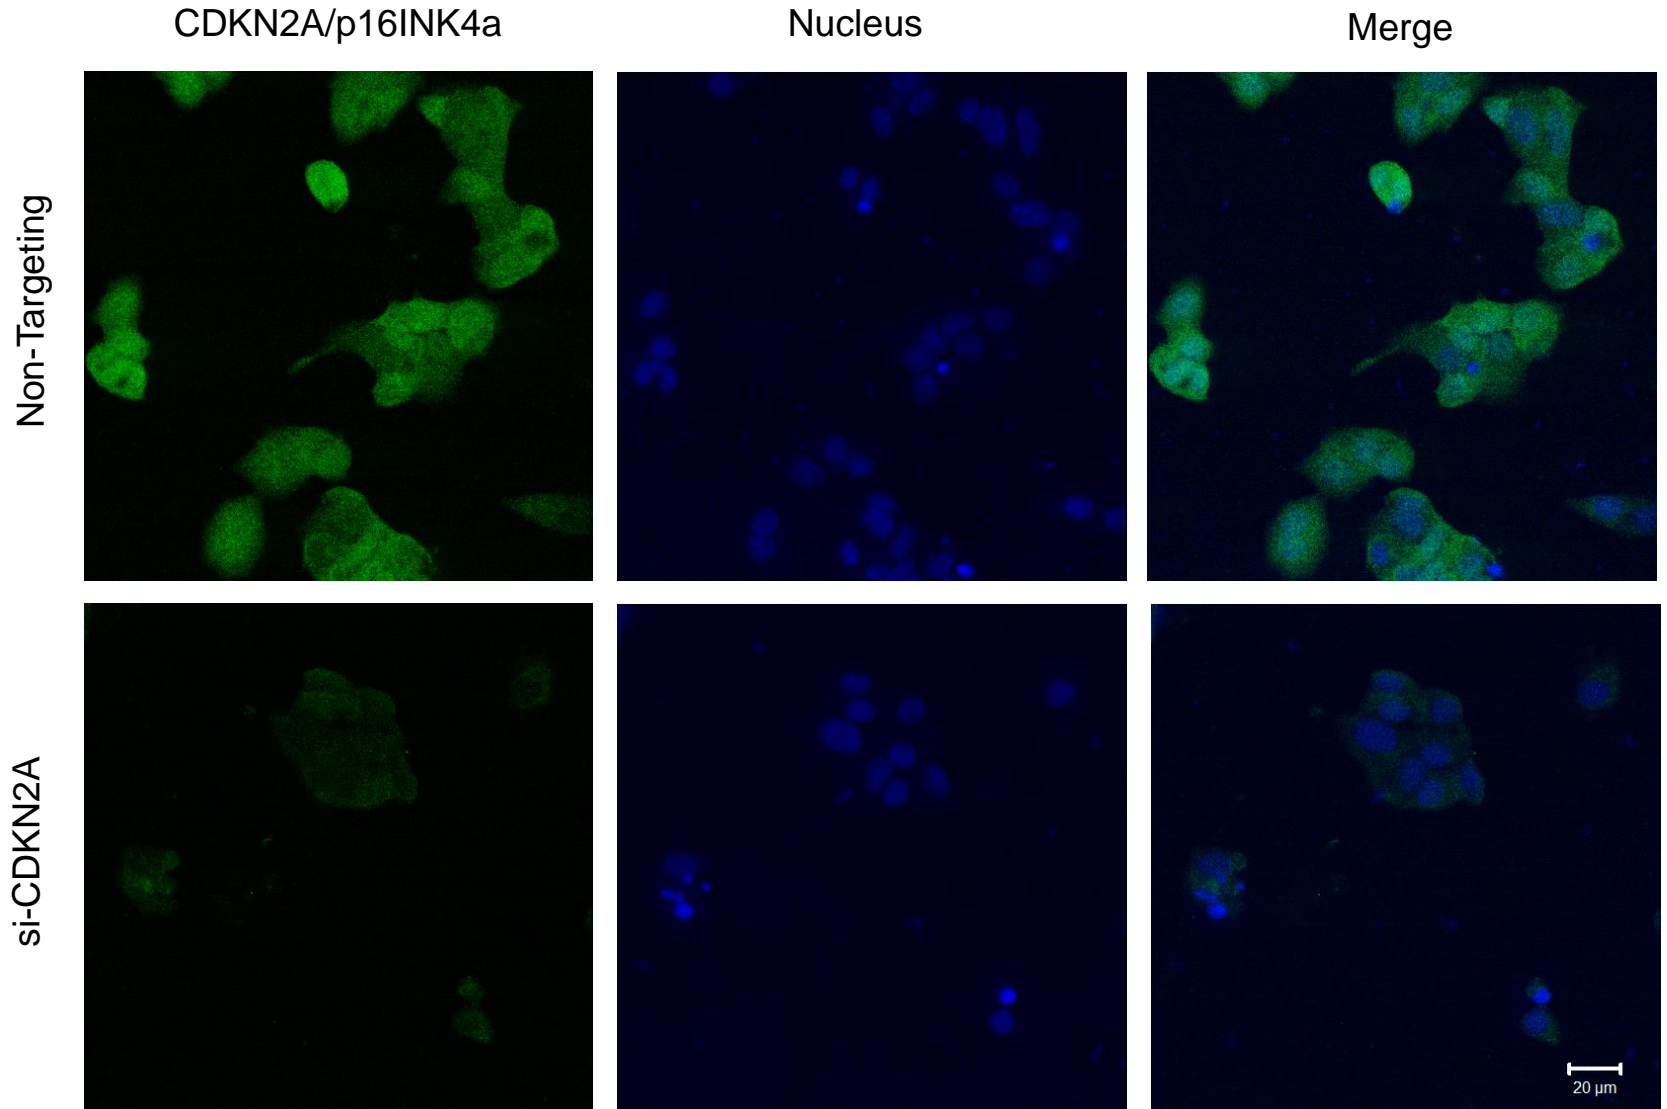

Supplementary figure 4

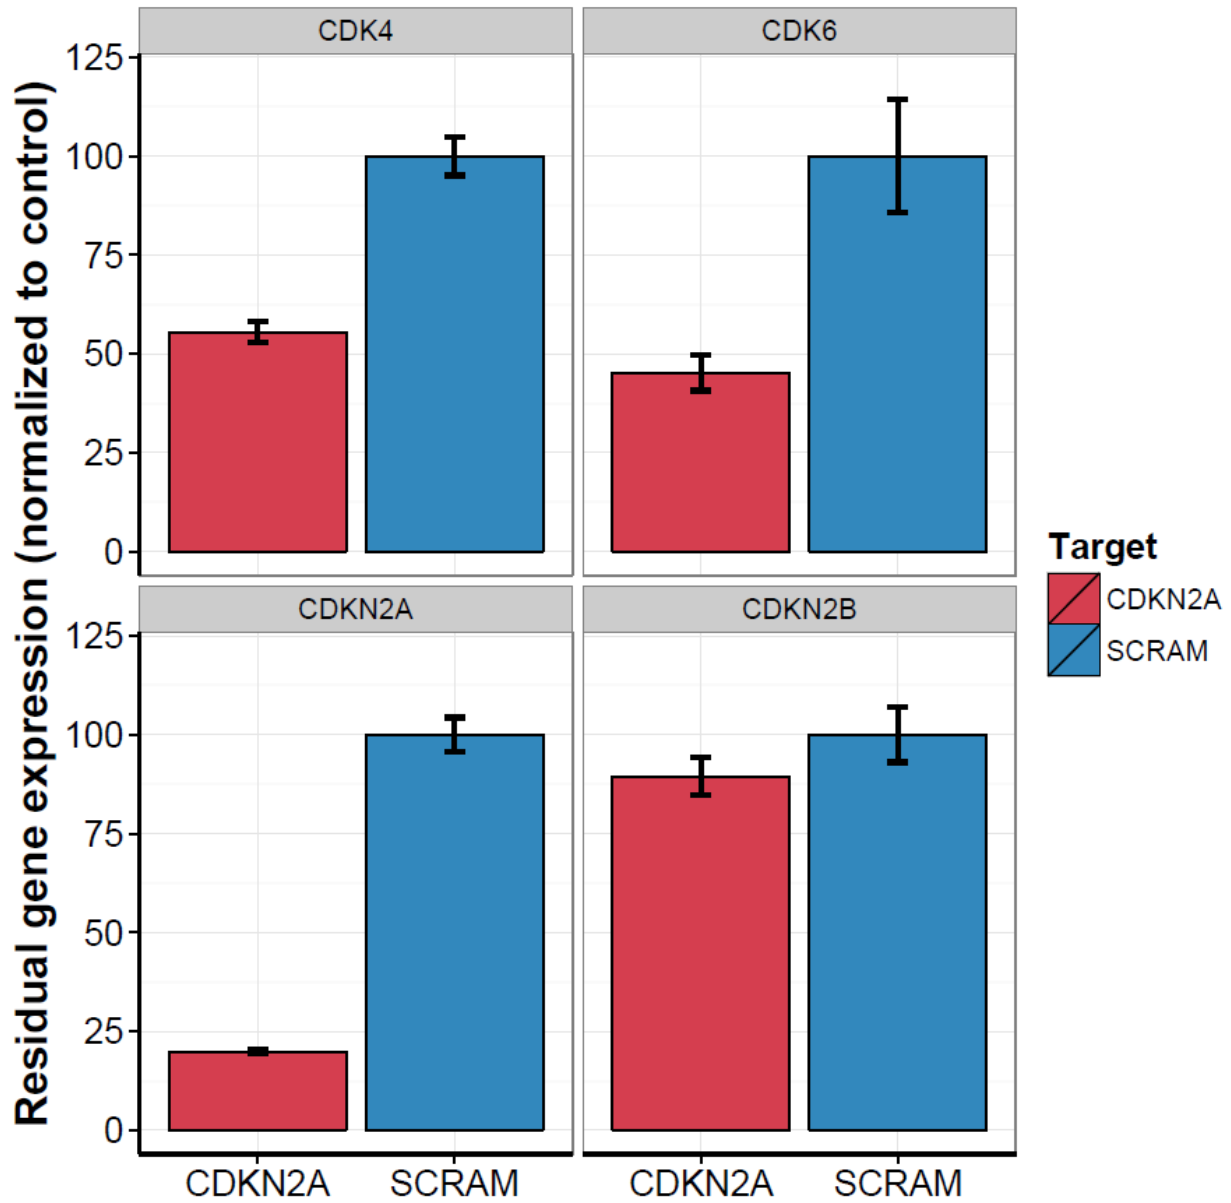

## Supplementary figure 5

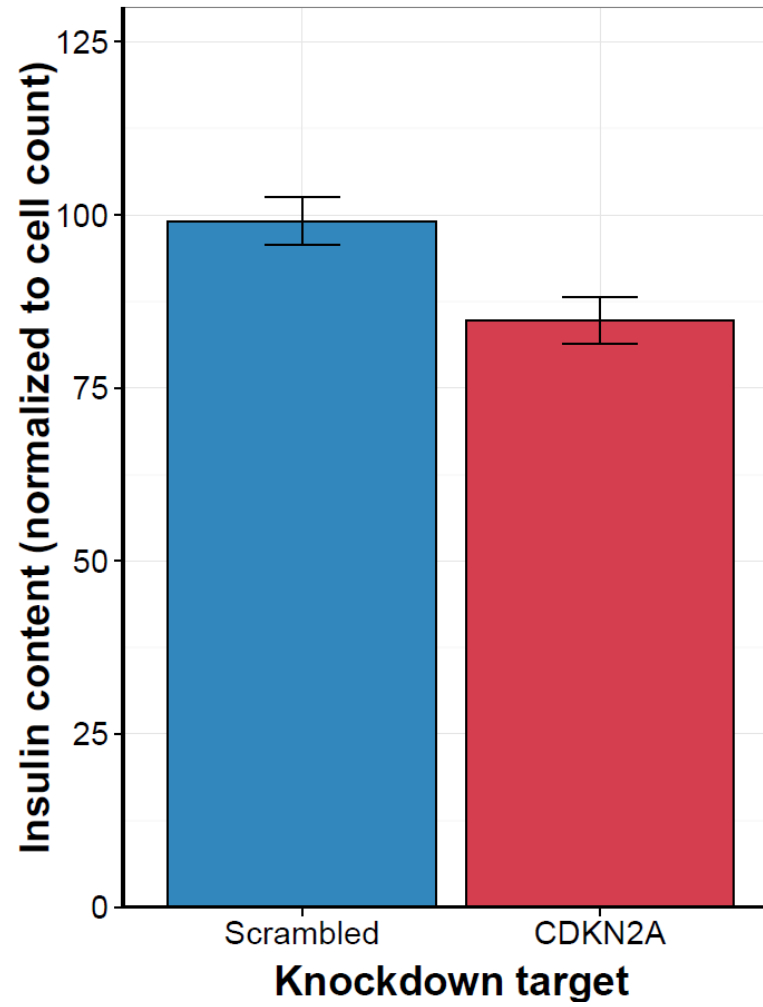

Supplementary figure 6

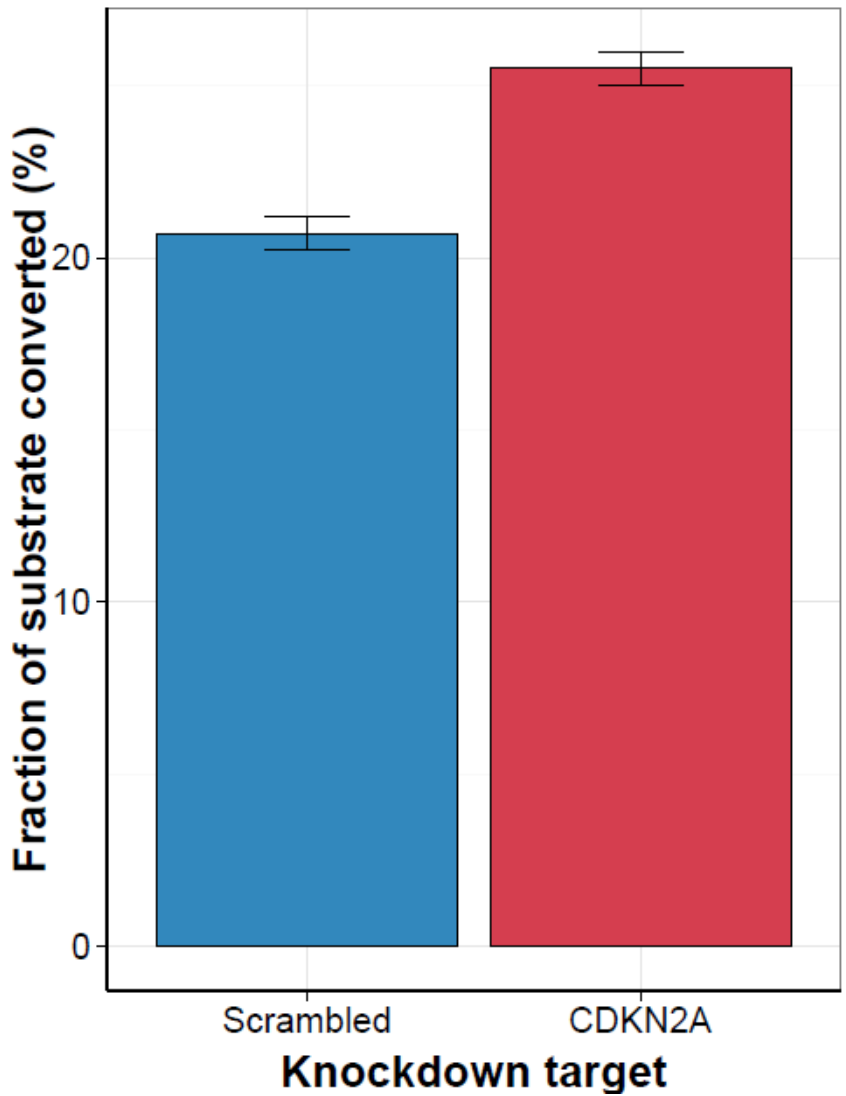

## Supplementary figure 7

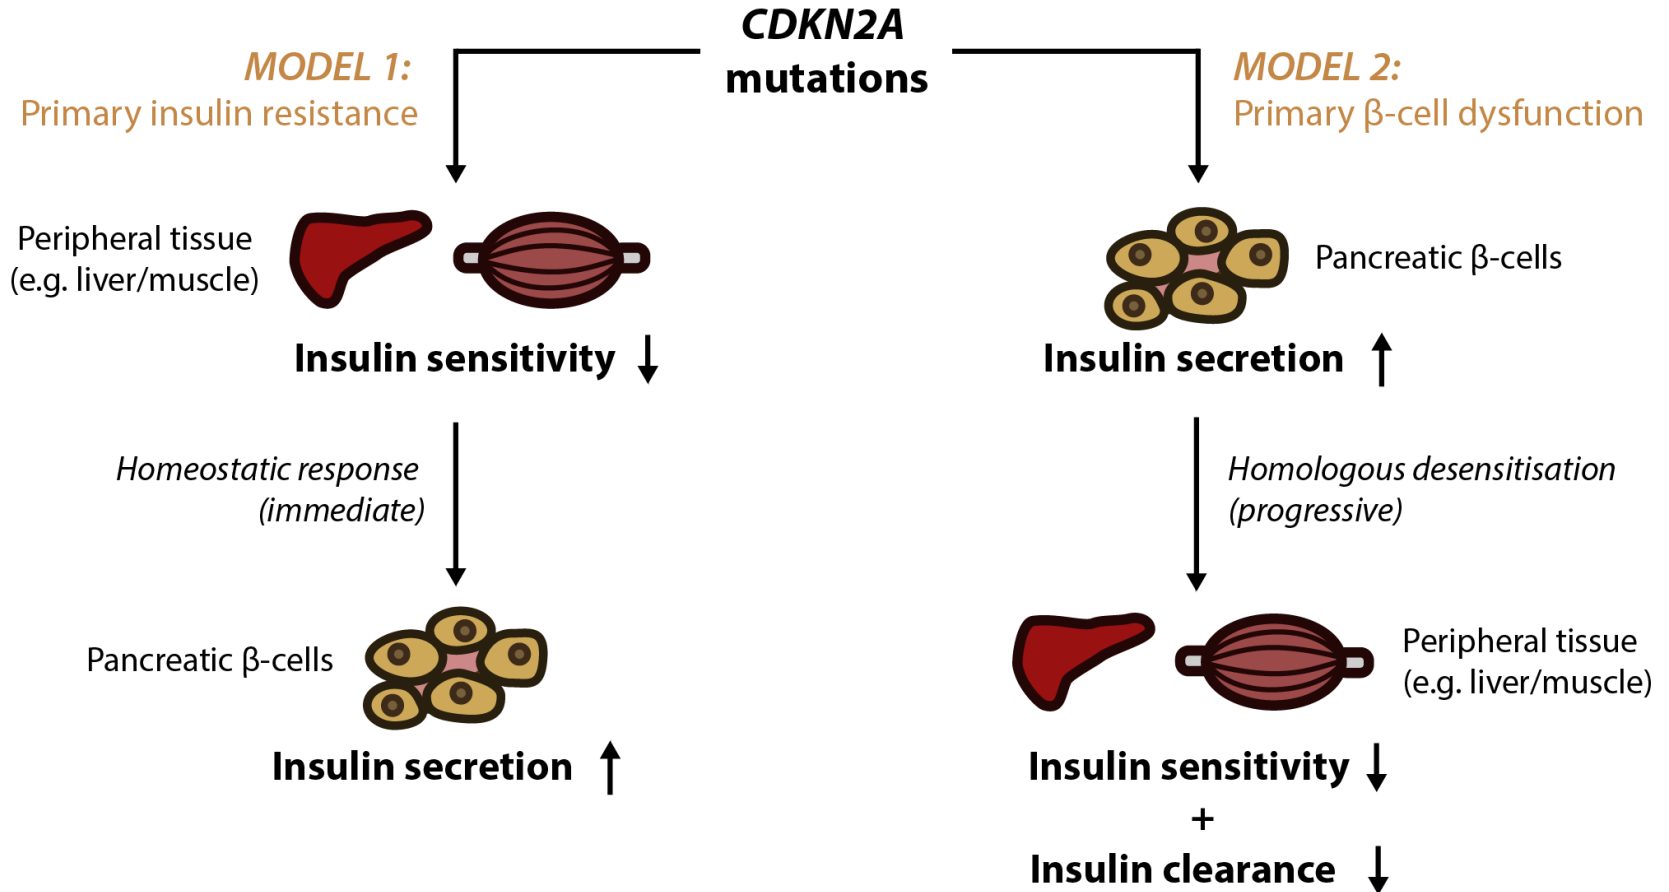

### Supplementary figure 8

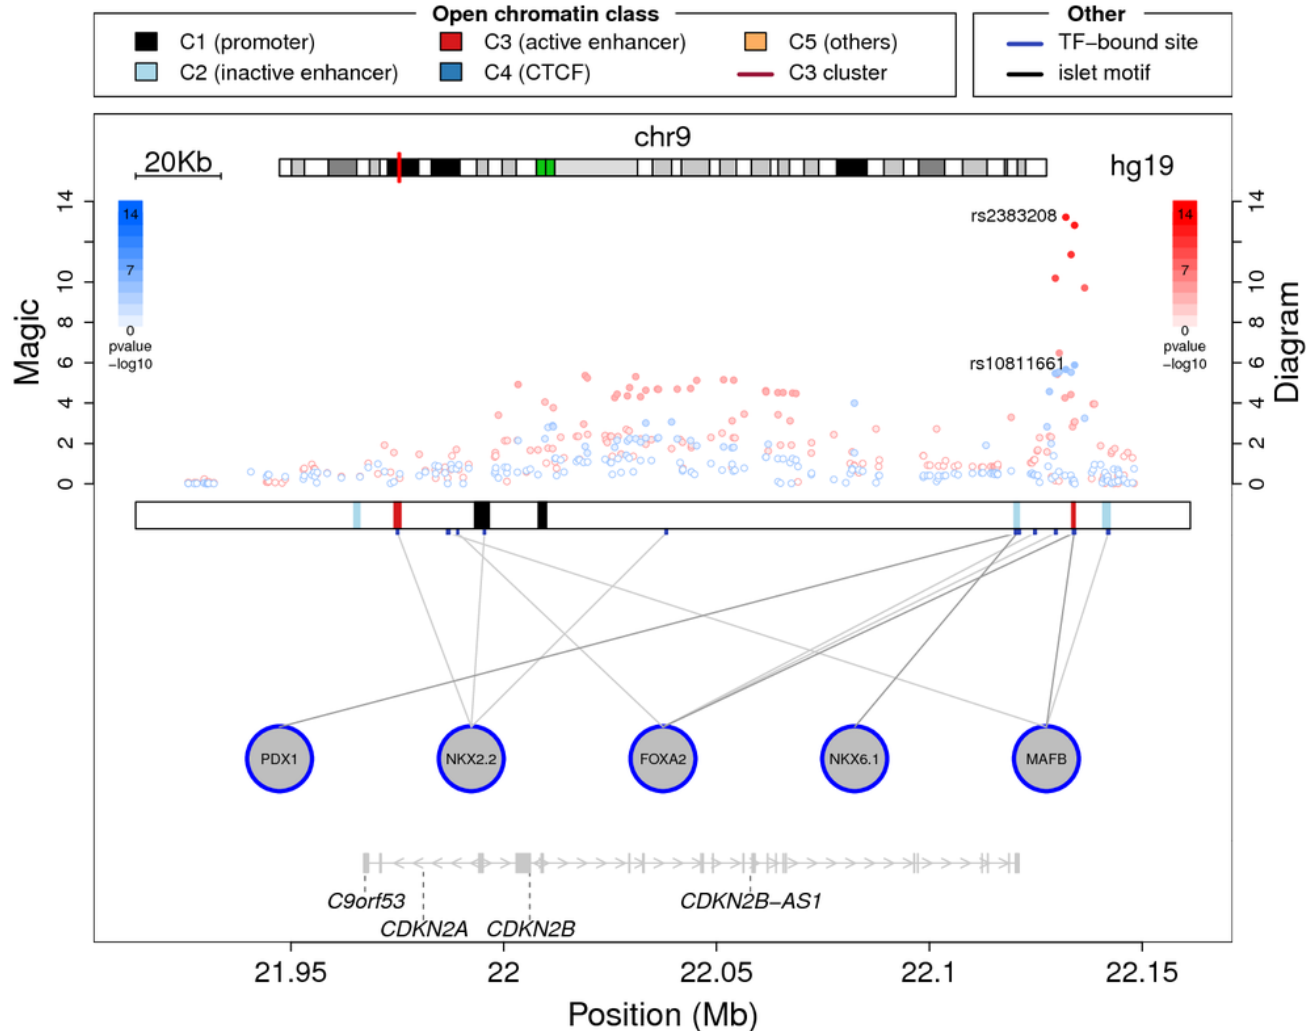

Supplement: NIHMS66059-supplement-01.pdf [file NIHMS66059-supplement-01.pdf]
